# Supplementary material for: Atrial fibrillation among patients under investigation for suspected obstructive sleep apnea
Source: PLoS One. 2017 Feb 8;12(2):e0171575. doi: 10.1371/journal.pone.0171575 (PMC5298247; doi:10.1371/journal.pone.0171575)
Supplement: S1 Dataset — (XLSX) [file pone.0171575.s001.xlsx]

## Sheet: Blad1
Inclusion number	Site	Age (years)	Sex	Known AF	New AF	Total AF	Heart failure	Hypertension	Diabetes	Earlier Stroke/TIA	Ischemic Heart Disease	Smoking	Beta Blocker	ASA	Oral Anti Coagulation	Systolic bloodpressure (mmHg)	Diastolic bloodpressure (mmHg)	Length (cm)	Weight (kg)	BMI (kg/m2)	Epworth Sleepiness Scale (ESS)	Apnea-Hypopnea Index (AHI)	Oxygen Desaturation Index (ODI)	Central and mixed apnea episodes (n)	Obstructive AHI	Central AHI	Mean saturation (%)	Lowest saturation (%)	% Saturation <90%	Mean apnea length (s)	Snoring	Breathing pauses	Daytime sleepiness	Referral
1	NUS	55	1	0		0	0	0	0	0	0	0	0	0	0			165	98	35.9963		14.5	20.6	0	14.5	0	90.1	79	37.9	17.1	1	0	1	2
2	NUS	61	1	0		0	0	1	0	0	0	2	0	0	0	130	87	170	80	27.6817	0	48.5	64.3	2	48.2	0.3	84.7	61	90.9	19.5	1	1	1	2
3	NUS	51	0	0		0	0	0	0	0	0	0	0	0	0	160	100	177	92	29.3658	8	4.3	6.1	1	4.2	0.2	94.1	89	0.1	25.6	1	1	1	2
4	NUS	40	1	0		0	0	1	0	0	0	1	1	0	0	140	82	160	126	49.2187	12	47.1	62.7	1	46.9	0.2	90.4	70	29.5	15.5	1	0	1	1
5	NUS	35	1	0		0	0	0	0	0	0	1	0	0	0	130	70	170	124	42.9066	9	1.2	4.6	5	0.5	0.6	94.3	87	0		1	0	1	1
6	NUS	70	1	0		0	0	0	0	0	0	1	0	0	0	140	90	167	88	31.5537	4	9	9.2	0	9	0	94.8	84	0.2	21.1	1	0	1	2
7	NUS	51	0	0		0	0	1	0	0	0	2	0	0	0	138	88	174	89	29.3962	14	27.2	29.6	2	26.9	0.3	93.2	83	2.5	17	0	1	0	2
8	NUS	46	0	0		0	0	0	0	0	0	0	0	0	0	120	80	170.5	74	25.4556	12	1.6	3.4	0	1.6	0	95.4	87	0	20.9	1	0	1	2
9	NUS	63	0	0		0	0	1	1	0	0	1	0	0	0	140	80	177	107	34.1537	11	24.8	27.3	8	24	0.8	93.5	79	4.8	20.1	1	1	1	2
10	NUS	52	0	0		0	0	1	0	0	0	0	0	0	0	155	100	162	98	37.3419	12	3.1	6.5	0	3.1	0	91.5	85	2.7	18.9	1	0	1	2
11	NUS	40	1	0		0							0	0	0	120	72	174	60	19.8177		1.9	3.2	4	1.9	0.5	95.9	93	0	26.3	1	0	0	2
12	NUS	62	0	0		0	0	0	3	0	1	1	1	1	0	105	70	174	137	45.2504	11	56	57	0	56	0	90.6	80	32.3	19.6	1	1	1	2
13	NUS	29	0	0		0	0	1	3	0	0	0	0	0	0	130	80	179	133.5	41.6654	14	14.1	23.6	0	14.1	0	89.1	77	56.2	13.7	0	0	1	2
14	NUS	33	1	0		0	0	0	0	0	0	0	0	0	0	120	80	152	96	41.5512	9			0							0	0	1	1
15	NUS	54	0	0		0	0	0	0	0	0	1	0	0	0	130	90	171	109	37.2764	0	13.2	13.7	0	13.2	0	93.5	84	1	18.8	1	1	1	2
16	NUS	54	1	0		0	0	1	0	0	1	1	0	1	0	120	80	168	70	24.8016	14	3.7	3.3	15	2	1.7	95.9	90	88	17.9	0	0	1	2
17	NUS	58	0	0		0	1	1	0	0	0	1	0	0	0	140	90	178	102.7	32.4138	5	58.4	59.6	0	58.4	0	91.4	76	91.4	18.8	1	1	1	1
18	NUS	58	1	0		0	0	0	0	0	0	1	0	0	0	120	80	162	88.5	33.722	13	24.5	22.3	0	24.5	0	95.4	80	0.4	20.7	1	0	1	2
19	NUS	52	1	0		0	1	0	0	0	0	1	0	0	0	120	75	162	106	40.3902	9	33.4	36.1	3	32.6	0.8	93.7	88	0.8	22.3	1	1	1	2
20	NUS	47	1	0		0	0	0	0	0	0	0	0	0	0	144	86	173	77.5	25.8946	12	1	2	0	1	0	94.8	90	0	19.2	1	0	0	2
21	NUS	56	1	0		0	0	1	0	0	0	0	0	0	0	140	80	162	76.4	29.1114	4	16.9	22.7	0	16.9	0	95.4	87	0.2	28.6	1	1	0	1
22	NUS	56	1	0		0	0	0	0	0	0	0	0	0	0	115	75	175	75.4	24.6204	7	19.6	19.5	0	19.6	0	94.5	87	1	24	1	0	0	1
23	NUS	76	0	0		0	1	1	3	0	1	0	1	1	0	143	72	173	121.3	40.5293	4	26.4	32.6	0	24.8	1.6	93.6	81	2.3	21.6	1	1	0	1
24	NUS	67	0	0		0	0	0	0	0	0	0	0	0	0	140	90	178	95	29.9836	15	47.5	47.9	23	44.7	2.8	94.4	94	3.4	28.4	1	1	1	2
25	NUS	75	0	0		0	0	0	0	0	0	0	0	0	0	140	84	184	83.5	24.6633	7	13.2	15.9	1	13.1	0.1	93.4	78	3.1	31.2	1	1	1	2
26	NUS	37	1	0		0	0	1	0	0	0	0	0	0	0	170	100	171.5	101	34.3394	14	79.5		0	79.5	0	79.4	50	93.7	17.7	1	0	1	1
27	NUS	33	0	0		0	0	1	0	0	0	0	0	0	0	140	90	187	128	36.6038	11	26.7	33.7	2	26.4	0.3	92.9	84	5.2	17.6	1	1	1	2
28	NUS	29	1	0		0	0	0	0	0	0	2	0	0	0	140	84	155.5	107	44.251	14	8.9	18.7	0	8.9	0	93	87	0.6	14.1	0	0	1	1
29	NUS	80	1	0		0	0	0	0	0	0	0	1	0	0	140	80	165.5	67.8	24.7533	7	19.6	25.2	0	19.6	0	93.9	83	1.4	13.9	0	1	0	2
30	NUS	60	0	0		0	0	1	0	0	0	1	0	0	0	128	81	181.5	103	31.2668	4	46.8	33.9	37	42.1	4.7	93.5	82	0.6	19.1	1	1	1	2
31	NUS	34	1	0		0	0	1	0	0	0	1	0	0	0	150	95	164	102	37.9239	14	9.1	14.6	0	9.1	0	95.9	89	0.1	13	1	0	1	2
32	NUS	55	1	0		0	0	1	0	0	0	0	0	0	0	140	85	174	105	34.6809	11	0	0	0	0	0	95.6	90	0	0	1	0	1	2
33	NUS	59	1	0		0	0	1	0	1	0	0	0	0	0	135	80	164	64	23.7954	1	22.3	22.7	1	22.2	0.1	94.4	86	2.1	32.8	0	1	1	2
34	NUS	68	0	0		0	0	1	0	0	0	1	1	0	0	145	70	174	87	28.7356	11	9.2	9.1	2	8.92	0.29	93.1	87	0.5	21.7	1	0	0	1
35	NUS	57	1	0		0	0	1	0	0	0	1	0	0	0	130	85	163	76	28.6048	14	12.1	14.1	1	11.95	0.12	92.7	81	1.6	18.2	1	0	1	2
36	NUS	53	0	0		0	0	1	0	0	0	0	1	0	0	140	87	176	95	30.6689	6	6.6	10	0	6.5	0	92.7	86	0.8	16.9	1	0	1	2
37	NUS	51	1	0		0	1	0	0	0	0	0	0	0	0	140	65	165	78.8	28.944	3	5.1	8.9	0	5.1	0	92.9	84	1.1	16.6	1	0	1	2
38	NUS	65	0	0		0	0	1	0	0	0	0	0	0	0	125	82	177	72	22.9819	12	33.1	33.6	38	28.3	4.73	93.5	78	4.8	32.9	1	1	1	2
39	NUS	64	0	0		0	0	1	0	0	0	1	0	0	0	130	80	179	67	20.9107	4	22.4	27.7	1	22.2	0.2	94.7	82	3	26	1	1	0	2
40	NUS	41	0	0		0	0	1	0	0	0	0	0	0	0	140	90	177	100.5	32.0789	11	51.8	51.3	24	48.6	3.2	93	77	6.9	23	1	1	1	2
41	NUS	63	0	0		0	0	0	0	0	0	1	0	0	0	120	75	174	90	29.7265	9	9.8	12.1	3	9.4	0.4	93.6	78	1.4	23.1	0	1	1	2
42	NUS	26	0	0		0							0	0	0	110	70	184	82	24.2202		6.1	7.9	2	5.9	0.2	94.8	86	0.3	23.7	1	1	1	2
43	NUS	43	0	0		0	0	0	0	0	0	1	0	0	0	140	90	184.5	88	25.8517	7.5	6.8	8.5	0	6.8	0	93.9	74	1.3	25.5	1	1	1	1
44	NUS	47	0	0		0	0	0	0	0	0	0	0	0	0	135	85	178	87	27.4587	8	19.2	23.4	0	19.2	0	93.7	78	2.8	23.5	1	0	0	1
45	NUS	60	0	0		0	1	1	0	0	1	1	1	1	0	125	85	180	102	31.4815	4	13	14.5	17	10.3	2.7	95.4	89	0	20.1	0	0	1	1
46	NUS	86	0	1		1	0	0	0	1	0	0	1	0	1	110	60	176	80	25.8264	5	17.8	24.1	74	7.7	10.1	95.9	81	3.5	27.8	1	0	1	2
47	NUS	44	0	0		0	0	0	0	0	0	1	0	0	0	120	80	169	73	25.5593	5	15.2	11.8	0	15.2	0	93.6	86	2	22.5	1	1	1	2
48	NUS	41	0	0		0	0	0	0	0	0	0	0	0	0	125	82	177	69.5	22.1839	14	4.8	6.2	0	4.8	0	95.3	87	0.1	23	1	1	1	2
49	NUS	45	0	0		0	0	1	0	0	0	0	1	0	0	140	92	172	99.5	33.633	9	67.8	55.9	1	67.7	0.1	94.1	63	11.5	27.5	1	1	1	2
50	NUS	67	1	0		0	0	1	0	0	0	1	1	0	0	130		157	66	26.7759	13	44.8	48.2	19	36.8	8	92.4	83	3.9	21.1	0	1	1	2
51	NUS	66	0	0		0	0	0	0	0	0	0	0	0	0	115	80	184	110	32.4905	6	26.1	29.1	11	24.6	1.5	93.3	82	3	22.1	0	1	1	2
52	NUS	52	0	0		0	0	0	0	0	0	0	0	0	0	105	70	176	62	20.0155	11.5	3.2	2.8	16	1.5	1.7	94.7	87	4	17.7	1	1	1	2
53	NUS	67	1	0		0	0	1	2	0	0	1	1	1	0	161	88	150	69.5	30.8889	6	10.8	14.9	2	10.5	0.3	94.4	83	2	19.8	0	0	1	2
54	NUS	43	0	0		0	0	0	0	0	0	0	0	0	0	139	84	185	98	28.634	11	8.1	9.2	0	8.1	0	95	79	2.3	36.6	1	1	1	2
55	NUS	50	0	0		0	0	0	0	1	0	0	0	0	0	120	85	179	81	25.2801	9	6.8	12.1	0	6.8	0	94.2	83	1.2	18.8	1	1	1	2
56	NUS	43	0	0		0	0	0	0	0	0	0	0	0	0	120	65	186	79.8	23.0663	9	2.2	3.2	0	2.2	0	95.9	92	0	19.9	1	0	0	2
57	NUS	60	1	0		0	0	0	0	0	0	1	0	0	0	130	80	174	75	24.7721	9	27.5	28.1	1	27.4	0.1	94.3	89	0.1	19.5	1	0	1	2
58	NUS	45	0	0		0	0	1	0	0	0	2	0	0	0	140	90	183	110	32.8466	3	18.9	24.7	3	18.5	0.4	93.3	71	7.1	21.2	1	1	1	2
59	NUS	29	0	0		0	0	0	0	0	0	2	0	0	0	140	88	185	101	29.5106	12	6.3	10.4	0	6.3	0	93.4	87	0.1	15.2	1	1	1	2
60	NUS	64	0	0		0	0	0	0	0	0	1	0	0	0	120	75	180	96.8	29.8765	7	19.6	18.5	6	18.9	0.8	93.5	78	3.2	28.8	1	1	1	2
61	NUS	58	0	0		0	0	0	0	0	0	2	0	0	0	140	90	179	97	30.2737	8	16.6	19.1	0	16.6	0	93.1	85	1.6	25.1	1	1	1	2
62	NUS	54	1	0		0	0	0	0	0	0	1	0	0	0	125	70	162.5	73.7	27.9101	18	16.4	12.3	107	2.7	13.7	94.6	89	0.1	12	0	0	1	2
63	NUS	78	0	0		0	1	0	0	0	0	0	0	0	1	130	80	178	73	23.04	2	3.8	94.1	3	3.3	0.5	94.1	88	0.1	26	1	1	0	1
64	NUS	52	1	0		0	0	0	0	0	0	0	0	0	0	118	82	172	84	28.3937	6	12	11.6	0	12	0	95.5	88	0.1	18.4	1	1	0	2
65	NUS	72	0	0		0	0	0	0	0	0	1	0	0	0	170	100	190	90	24.9307	11	4.2	6.7	1	4.1	0.1	93.4	87	0.8	25.5	1	1	1	1
66	NUS	42	1	0		0	0	0	0	0	0	1	0	0	0	120	80	168	68	24.093	9	28.9	31.1	4	28.3	0.6	94.5	71	4.9	19.4	1	1	0	2
67	NUS	56	0	0		0	0	1	0	0	0	1	1	0	0	140	78	183	123	36.7285	5	23.7	20.1	15	21.6	2.1	95.1	68	2	19.7	1	0	0	1
68	NUS	58	0	0		0	0	0	0	0	0	0	0	0	0	140	78	186	79	22.835	8	1.7	4.5	0	1.7	0	96	92	0	23.7	1	1	0	2
69	NUS	52	0	0		0	0	1	0	1	0	0	0	0	0	120	85	182	100	30.1896	2	1.3	2.3	2	1.1	0.2	93.7	90	0	14.2	1	1	0	1
70	NUS	68	0	0		0	0	1	0	0	0	0	0	0	0	120	70	176	91	29.3776	5	15.8	17.1	0	15.8	0	92.6	86	3.4	18.5	1	1	0	2
71	NUS	41	0	0		0	0	0	0	0	0	0	0	0	0	130	90	176	101	32.6059	3	1.8	3.7	2	1.6	0.2	96.1	91	0	15.7	1	0	0	2
72	NUS	57	0	0		0	0	1	0	0	0	1	0	0	0	140	85	177	82	26.1738	12	15.2	19.8	0	15.2	0	94.4	84	0.2	23.2	1	0	1	2
73	NUS	64	0	1		1	0	1	0	0	0	1	1	0	1	120	80	178	92.5	29.1945	5	19.3	20.4	39	13.8	5.5	94.6	87	0.3	20	1	1	0	2
74	NUS	44	0	0		0	0	0	0	0	0	0	0	0	0	126	67	180	90	27.7778	10	0.6	1.3	1	0.4	0.1	95.9	86	0.1	18.3	1	0	1	2
75	NUS	31	0	0		0	0	0	0	0	0	0	0	0	0	120	80	185	93	27.1731	17	21	21.1	5	20.2	0.7	95.5	86	0.4	27.7	1	0	1	2
76	NUS	76	1	0		0	0	1	0	0	0	1	0	0	0	145	90	157	97	39.3525	6	56.4	68.5	0	56.4	0	90.7	63	27.8	23.8	0	1	0	2
77	NUS	62	0	0		0	0	0	0	0	0	0	0	0	0	135	75	180	98	30.2469	8	1	2.9	0	1	0	92.3	89	0.3	33.8	0	1	1	2
78	NUS	28	1	0		0	0	0	0	0	0	0	0	0	0	100	60	164	67	24.9108	16	3.5	7.2	0	3.5	0	96.2	96.2	0	20.4	1	0	1	2
79	NUS	75	0	0		0	0	0	0	0	0	0	0	0	0	140	88	173	81	27.0641	1	10.5	14.6	8	9.5	1	93.9	77	0.8	22.6	1	1	1	2
80	NUS	54	0	0		0	0	0	0	0	0	2	0	0	0	135	85	187	118	33.7442	18	78.8	81.3	44	69.7	9.1	88.4	71	49.5	25	1	1	0	2
81	NUS	64	0	0		0	0	1	0	0	0	1	0	0	0	140	65	174	109	36.0021	14	45	46.2	10	43.3	1.6	90.9	82	25.2	19.7	1	0	1	1
82	NUS	60	1	0		0	0	0	0	0	0	1	0	0	0	140	80	164	79	29.3724	4	10.7	13.9	1	10.6	0.1	94.5	86	0.1	17.9	1	0	1	1
83	NUS	58	0	0		0	0	1	0	0	0	0	0	0	0	155	120	189	102	28.5546	21	74.2	75.3	41	67.9	6.3	92	74	25.2	29	1	1	1	2
84	NUS	53	0	0		0	0	1	0	0	0	0	1	0	0	140	90	178	95	29.9836	8	36	42.9	2	35.6	0.4	91.1	83	18.1	19.7	0	1	1	2
85	NUS	46	1	0		0	0	0	0	0	0	1	0	0	0	120	80	168	76	26.9274	19	3.1	6.3	0	3.1	0	95.9	87	0	23.7	1	0	1	2
86	NUS	65	0	0		0	0	0	0	0	0	1	0	0	0	120	80	175	133	43.4286	5	7.9	11	0	7.9	0	91.4	80	10	29.1	1	1	1	2
87	NUS	50	0	0		0	0	1	0	0	0	0	0	0	0	132	96	175	104	33.9592	9	58.3	68.1	2	57.9	0.37	92.9	84	7.9	16.5	1	0	1	2
88	NUS	67	1	0		0	0	1	0	0	0	0	0	0	0	160	90	168	68	24.093	5	15.9	19.7	1	15.8	0.1	94.3	86	0.4	24.5	0	1	0	2
89	NUS	51	1	0		0	0	0	0	0	0	0	0	0	0	130	86	162	52.3	19.9284	1	2.6	2.9	1	2.5	0.1	94.6	91	0	17	1	0	1	2
90	NUS	28	0	0		0	0	0	0	0	0	2	0	0	0	110	65	182	94	28.3782	7	1.1	3.6	2	0.8	0.3	95.7	91	0	41.2	1	1	1	2
91	NUS	68	0	1		1	0	1	0	0	1	0	1	0	1	105	70	179	90	28.089	5	43.4	46.3	29	29.9	13.4	92.7	79	9.8	24.2	1	1	1	2
92	NUS	50	0	0		0	0	0	0	0	0	0	0	0	0	130	80	183	81	24.187	8	16.3	23.5	0	16.3	0	93.4	83	1.2	23.5	1	1	1	2
93	NUS	46	0	0		0	0	0	0	0	0	1	0	0	0	160	95	182	108	32.6048	7	25.3	35.9	0	25.3	0	92.2	83	3.6	17.3	1	0	1	2
94	NUS	33	0	0		0	0	0	0	0	0	1	0	0	0	125	85	180	80	24.6914	9	3.4	4.3	0	3.4	0	95.6	91	0	24.2	1	1	1	2
95	NUS	67	0	0		0	0	1	0	0	1	2	1	0	0	140	85	169	110	38.5141	9	58.6	64.3	0	58.6	0	92.2	77	10.1	19.8	1	1	1	2
96	NUS	67	0	0	1	1	0	0	0	0	0	2	0	0	0	135	90	181	83	25.335	7	43.9	45.3	168	24.3	19.8	94.6	85	2.8	20.2	1	1	1	2
97	NUS	79	0	0		0	0	1	0	0	0	0	0	0	0	160	80	170	74	25.6055	1	21.5	23	24	17.2	4.3	93.6	86	0.9	21.4	1	1	0	2
98	NUS	61	0	0		0	0	0	2	0	1	1	1	1	0	140	80	180	83.8	25.8642	9	15.3	19.5	0	15.3	0	93	80	3	21.2	1	0	0	2
99	NUS	53	1	0		0	0	0	0	0	0	0	0	0	0	130	85	170	98.5	34.083	13	8.7	13.1	0	8.7	0	94.7	86	0.4	13.7	1	0	0	1
100	NUS	66	1	0		0	0	0	0	0	0	0	1	0	0	135	85	172	105	35.4922	15	5.6	10.4	0	5.6	0	92.2	85	1.8	18.6	1	0	1	2
101	NUS	56	0	0		0	0	1	0	0	0	1	0	0	0	136	84	184	97	28.6508	8	16.8	19.5	0	16.8	0	93.1	70	5.1	23.7	1	1	0	2
102	NUS	55	0	0		0	0	0	0	0	0	0	0	0	1	140	82.5	174	82.5	27.2493	1	10.4	13.8	0	10.4	0	94.7	90	0	15.7	1	1	1	2
103	NUS	61	0	0		0	0	1	0	0	0	1	0	0	0	138	92	182	110	33.2085	3	26.9	95.4	9	25.5	1.2	95.4	86	0.1	20.5	0	1	1	2
104	NUS	74	0	0		0	0	1	0	0	0	0	0	0	0	140	85	175	105	34.2857	1	22.1	21.9	1	22.1	0.3	93.9	83	1.4	17.6	1	1	0	2
105	NUS	63	0	0		0	0	1	0	0	1	0	0	0	0	135	80	176	81	26.1493	15	28.7	30.9	0	28.7	0	92.1	83	5.7	24.5	1	1	0	2
106	NUS	47	1	0		0	0	0	0	0	0	0	0	0	0	120	75	164.5	83	30.6723	3	5.7	14.5	0	5.7	0	94.8	87	0.1	17.9	1	1	1	1
107	NUS	32	0	0		0	0	0	0	0	0	0	0	0	0	140	75	180	112	34.5679	12	5.8	8.5	0	5.8	0	95	86	0.2	21.1	1	1	1	2
108	NUS	57	1	0		0	0	0	0	0	1	1	0	1	0	110	70	161	76.1	29.3584	8	8.5	11.9	1	8.4	0.1	94.9	82	0.7	19.1	1	0	1	2
109	NUS	59	1	0		0	0	0	0	0	0	1	0	0	0	160	90	162	81	30.8642	8	14.9	21.5	0	14.9	0	91.7	83	9.9	18.6	1	1	0	1
110	NUS	50	0			0							0	0	0	130	90	173	90	30.0712		7.1	10.1	0	7.1	0	95.1	88	0	13.7	1	1	1	2
111	NUS	46	1	0		0	0	0	0	0	0	1	0	0	0	105	65	178	71	22.4088	8	6	3.1	0	6	0	95.9	90	0	19.1	1	1	0	2
112	NUS	70	0	0		0	0	1	0	0	0	2	0	0	0	120	75	178	78	24.6181	2	9.7	16.3	0	9.7	0	93.4	75	5	27	1	0	1	2
113	NUS	21	0	0		0	0	0	0	0	0	1	0	0	0	115	75	174	74	24.4418	16	4.8	7.5	0	4.8	0	93.3	86	0.7	18.6	1	1	1	2
114	NUS	39	0	0		0	0	0	0	0	0	1	0	0	0	110	75	184	85	25.1063	2	4.8	7.7	0	4.8	0	94.4	90	0	19.9	1	1	1	2
115	NUS	62	0	0		0	0	1	0	0	0	0	0	0	0	130	85	188	93	26.3128	9	16.2	18.6	11	14.4	1.9	94.2	84	0.5	23.3	1	1	1	2
116	NUS	57	1	0		0	0	0	0	0	0	1	0	0	0	165	100	154	66	27.8293	2	0.2	2.5	0	0.2	0	94.1	91	0	12.6	0	0	0	2
117	NUS	44	0	0		0	0	0	0	0	0	0	0	0	0	120	80	189	89	24.9153	19	5.3	7.9	3	4.9	0.4	94.5	87	0.1	17.4	1	0	1	2
118	NUS	65	0	0	1	1	0	1	2	0	1	0	1	0	0	130	75	182	104	31.3972	18	14.6	19.7	3	14.2	0.4	94.7	87	0.1	16.4	1	1	1	2
119	NUS	43	0	0		0	0	0	0	0	0	1	0	0	0	115	80	182	77.3	23.3366	7	1.3	6.6	0	1.3	0	95.9	84	0	24.2	1	1	0	2
120	NUS	58	0	0	1	1	0	0	0	0	0	1	0	0	0	160	120	178	95	29.9836	19	27.1	35.5	0	27.1	0	93.6	83	0.9	16.2	1	1	1	2
121	NUS	62	0	0		0	0	0	0	0	0	1	0	0	0	160	90	170	101	34.9481	18	18.3	26.8	0	18.3	0	92	82	9.2	21.2	1	1	1	2
122	NUS	57	1	0		0	0	0	0	0	0	0	0	0	0	120	70	167	78	27.968	7	19.3	21	0	19.3	0	91.7	65	12.4	32.8	1	1	0	2
123	NUS	67	0	0		0	0	1	0	0	0	0	0	0	0	138	84	177	78	24.8971	1	16.9	19.3	0	16.9	0	91.1	76	22.7	36.1	1	1	0	2
124	NUS	61	0	0		0	0	1	0	0	0	2	0	0	0	122	75	167	77	27.6095	2	4.1	3.3	0	4.1	0	94.2	91	0	15.5	1	0	1	2
125	NUS	51	0	0		0	0	0	0	0	0	1	0	0	0	135	88	176	104	33.5744	10	13.4	21.3	0	13.4	0	91.7	81	6	19.9	1	0	1	2
126	NUS	56	0	0		0	0	1	0	0	0	0	0	0	0	130	90	180	97	29.9383	9	12.3	17.5	1	12.1	0.2	93.6	87	0.5	21.7	1	0	1	1
127	NUS	56	1	0		0	0	1	0	0	0	1	0	0	0	120	82	161	77.4	29.86	6	8.6	15.9	0	8.6	0	93.2	82	1.1	21.8	1	1	1	2
128	NUS	68	0	0		0	0	0	0	0	0	1	1	1	0	100	65	183	76	22.694	7	23.3	27.7	14	21.6	1.7	93.9	82	1	29.7	1	1	1	2
129	NUS	62	1	0		0	0	1	0	0	0	0	0	0	0	140	80	178	82.5	26.0384	2	6.6	8.3	2	6.3	0.3	91.4	79	9.3	19.7	1	1	1	2
130	NUS	77	0	0		0							0	0	0	125	70	177	77	24.5779		22.7	35	0	22.7	0	92.8	83	6	23.3	1	1	1	2
131	NUS	66	0	0		0	0	1	1	0	0	1	0	1	0	162	70	181	137	41.818	7	21.6	28.9	3	21.2	0.4	93.6	84	2.7	19	1	0	1	2
132	NUS	42	0	0		0	0	1	0	0	0	0	0	0	0	150	100	182	118	35.6237	18	20.9	28.7	0	20.9	0	91.7	84	5.5	21	1	0	1	2
133	NUS	60	1	0		0	0	0	0	0	0	1	0	0	0	140	90	153	87	37.1652	8	1.5	1.8	0	1.5	0	95.2	91	0	17.3	0	1	1	2
134	NUS	66	0	0		0		1	0	0	1	1	1	1	0	140	65	177	128	40.8567	3	80.1	85.8	3	80.1	0.7	75.8	50	94.9	21.8	0	1	0	2
135	NUS	62	0	0		0	0	1	0	0	0	1	0	0	0	145	90	173	74	24.7252	13	11.4	16.8	8	10.5	0.9	93.6	76	2.1	20	1	1	1	2
136	NUS	64	0	0		0	0	1	0	0	0	1	0	0	0	135	80	175	105	34.2857	12	20.8	22.7	0	20.8	0	91.7	78	4.2	20.7	1	0	0	2
137	NUS	54	0	0		0	0	0	2	0	0	0	1	0	1	130	75	163	74	27.852	13.5	10	14	0			94.2	89	0		1	0	1	1
138	NUS	72	0	1		1	0	1	2	1	0	0	1	0	1	130	76	183	87	25.9787	16	17.1	18.8	16	14.9	2.2	92.2	83	5.5	21.6	0	1	0	1
139	NUS	59	0	0		0	0	1	0	0	0	0	0	0	0	138	85	184	102	30.1276	12	19.5	19.7	1	19.4	0.1	94.9	83	0.9	31.1	0	1	1	2
140	NUS	58	1	0		0	0	0	0	0	0	1	0	0	0	140	92	172	75	25.3515	12	5.2	8.2	0	5.2	0	94.1	88	0.1	18.1	0	1	1	2
141	NUS	82	0	1		1	1	1	3	0	1	1	0	0	0	120	50	170	76	26.2976	5	34.5	16.9	0	34.5	0	90.8	69	47.5	24	0	0	0	2
142	NUS	79	0	0		0	0	1	0	0	0	1	0	0	0	140	75	168	67	23.7387	6	6.3	7.3	0	6.3	0	94.3	88	0.4	22.5	1	1	0	1
143	NUS	61	1	0		0	0	1	0	0	0	0	1	0	0	130	82	165	78	28.6501	19	10.2	20.6	0	10.2	0	92.4	79	7.8	16.3	1	1	1	2
144	NUS	76	1	0		0	1	1	0		1	1	1	1	0	160	88	159	71	28.0843	1	28.4	30.8	18	26.2	2.2	93.2	84	3.2	18.9	1	0	0	1
145	NUS	58	0	0		0	0	1	2	0	0	1	0	0	0	140	82	177	104.5	33.3557	20	31.7	43	0	31.7	0	91.9	74	10.9	21.6	1	1	1	2
146	NUS	69	0	1		1	0	0	0	0	0	0	1	1	0	120	80	180	87	26.8519	3	16.3	17.2	6	15.5	0.8	94.4	84	0.5	25.6	1	1	0	2
147	NUS	54	0	0		0	0	0	0	0	0	1	1	0	0	115	75	184.5	80	23.5016	10			0							1	1	1	1
148	NUS	60	1	0		0	0	0	0	0	0	0	0	0	0	145	82	172	85	28.7317	11	20.9	23.5	0	20.9	0	93.3	76	4	18.8	1	1	1	2
149	NUS	67	0	0		0	0	1	2	0		2	1	1	0	140	75	178	104	32.8241	4	7.6	9.3	0	7.6	0	93.3	88	0.4	24.2	1	0	1	2
150	NUS	60	0	0		0	0	1	0	0	0	1	0	0	0	135	90	179	91	28.4011	9	29.9	32.5	46	23.5	6.4	93.4	82	3.5	23.3	1	1	0	2
151	NUS	61	1	0		0	0	0	0	0	0	0	0	0	0	120	85	163.5	73.5	27.4949	14	3.3	7	1	3.2	0.1	95.1	88	0.1	23.3	1	0	1	2
152	NUS	60	1	0		0	0	1	0	0	0	0	0	0	0	135	90	171	80	27.3588	13	4.3	9.3	0	4.3	0	93.8	88	0.4	19	1	0	0	2
153	SHC	42	0	0		0	0	1	1	0	1	1	1	1	0	130	80	181	109	33.3	11	54	50	0	54	0	93.8	76	5.5	15.5	0	0	1	2
154	SHC	64	1	0		0	0	1	0	0	0	0	?	0	0	140	90	167	99	35.5	7	52.6	32	21	49.8	2.9	92.9	69	8.2	21.4	1	1	0	2
155	SHC	69	0	0		0	0	1	0	0	0	0	1	0	0	145	85	169	80	28	9	37.4	36	131	23.7	13.7	90.6	68	31.2	22	1	1	0	2
156	SHC	57	0	0		0	0	1	0	0	0	0	0	0	0	140	80	177	95	30.3	9	39.1	33	19	36.2	2.8	92.3	83	4.1	17.9	1	0	0	2
157	SHC	51	0	0		0	0	0	0	0	0	0	0	0	0	130	85	179	82	25.6	9	13	13	4	12.5	0.6	92.1	83	4.8	22.5	0	0	1	2
158	SHC	67	1	0		0	0	1	0	0	0	1	0	0	0	145	90	166	88	31.9	11	10	11	0	10.3	0	88.6	62	63.9	22.4	1	0	0	2
159	SHC	59	0	0		0	0	0	0	0	0	0	0	0	0	130	80	180	97	29.9	1	35	30	0	34.9	0	94.4	81	2.8	19.8	1	0	1	2
160	SHC	76	1	0		0	0	1	0	0	0	0	1	0	0	155	75	165	84	30.9	2	39	31	0	38.5	0	93.9	72	4.5	22	1	0	1	2
161	SHC	49	1	0		0	0	0	0	0	0	0	0	0	0	115	90	154	71	29.9	20	89	85	8	87.8	1.1	90.7	67	38.2	25.6	0	0	1	2
162	SHC	63	1	0		0	0	0	0	0	0	0	0	0	0	120	80	182	102	30.8	9	18	16	0	17.5	0	90.7	70.6	25.6	17.4	1	0	1	2
163	SHC	62	1	0		0	0	0	0	0	0	0	0	0	0	120	80	1.87	75	21.4	7	16	10	0	16.2	0	94.1	76	3.1	22.3	1	1	1	2
164	SHC	63	0	0		0	0	0	0	0	0	0	0	0	1	130	75	173	100	33.4	6	31.6	30	6	30.9	0.7	90.6	65	24.2	32.9	1	1	0	2
165	SHC	56	1	0		0	0	1	0	0	0	0	0	0	0	110	75	156	93.7	38.5		35	35	0							0	0	1	2
166	SHC	63	0	1		1	0	1	0	0	0	2	1	0	1	138	90	174	88	29.1	10	10	10	2	9.9	0.3	93.5	83	2.7	18	1	1	0	1
167	SHC	47	0	0		0	0	1	0	0	0	1	0	0	0	140	90	190	145	40.7		92	70	0	91.5	0	87	71	69.5	22.8	1	1	0	2
168	SHC	56	0	0		0	0	0	0	1	0	0	0	1		150	90	176	101	32.3	0	46	Bad signal	8	44.7	1.2				22.8	0	1	0	2
169	SHC	38	0	0		0	0	0	0	0	0	0	0	0	0	125	75	184	108	31.9	13	30.8	Bad signal	29	26.3	4.5				29.2	1	1	0	2
170	SHC	66	0	1		1	0	1	0	0	1	0	1	0	1	115	60	184	92	27.2	12	42.7	41	76	32.9	9.7	91.7	65	20.9	45.8	0	1	0	2
171	SHC	68	1	0		0	0	1	0	0	0	2	0	0	0	140	80	163	85	32	13	26	24	2	25.9	0.3	94.8	82	1.9	18.2	0	1	1	2
172	SHC	71	0	1		1	0	0	0	0	0	0	1	0	1	110	80	179	79	25.8	9	37.3	26	79	27.5	9.8	94.5	82	0.8	22.3	1	0	1	1
173	SHC	40	0	0		0	0	0	0	0	0	0	0	0	0	145	100	197	115	29.6	6	23	24	0	22.7	0	93.2	83	6.9	21.4	1	1	0	2
174	SHC	36	0	0		0	0	1	0	0	0	1	0	0	0	125	85	169	90	31.5	19	22	15	1	21.9	0.1	88.5	50	38.9	18.7	1	0	1	2
175	SHC	50	0	0		0	0	1	0	0	0	0	0	0	0	110	80	175	88	28.7	11	11	12	4	10.9	0.5	95	90	0	16.4	0	1	1	2
176	SHC	50	0	0		0	0	1	0	0	0	0	1	0	0	180	110	186	140	40.5	9	88.7	87	68	80.4	8.3	85.7	64	70.1	25.6	0	0	0	2
177	SHC	60	1	0		0	0	1	2	0	0	0	0	0	0	140	80	172	90	30.4	9	26	25	3	26	0.4	92.1	69	13.8	25.6	1	0	1	2
178	SHC	61	1	0		0	0	1	0	0	0	1	1	0	0	120	80	176	110	35.5	13	55.7	51	199	34.8	20.9	93	79	8.9	17.4	1	1	1	2
179	SHC	36	0	0		0	0	0	0	0	0	0	0	0	0	135	85	181	92	28.1	16	73	67	9	71.7	1.2	92	77	24.4	34.1	1	1	1	2
180	SHC	44	0	0		0	0	0	0	0	0	1	0	0	0	100	70	194	80	21.3	5	28	24	3	27.5	0.3	93.4	85	1.3	32.4	1	0	1	2
181	SHC	53	1	0		0	0	1	0	0	0	0	0	0	0	120	80	159	83	32.8	0	16	17	0	16.3	0	92.9	83	3.5	14.6	1	0	0	2
182	SHC	67	0	0		0	0	1	0	0	0	0	0	0	0	140	80	174	86	28.4	8	19.9	17	23	16.3	3.5	93.3	72	4.6	22.5	1	1	0	2
183	SHC	76	1	0		0	0	1	0	0	0	0	0	1	0	140	90	160	65	25.4	2	36	38	0	36.2	0	87.3	69	76.6	24.4	1	0	1	2
184	SHC	50	0	0		0	0	1	0	0	0	0	0	0	0	105	70	168	91	32.2	9	15.2	15	32	11.4	3.8	93.8	83	1.8	15.2	1	0	1	2
185	SHC	58	0	0		0	0	0	0	0	0	0	0	0	0	115	85	181	90	27.5	6	26	22	2	25.8	0.2	92	74	8.7	18	1	0	1	2
186	SHC	53	0	0		0	0	0	0	0	0	0	0	0	0	120	85	186	96	27.7	19	57.8	59	13	54.1	3.6	88.4	70	57	26.6	0	1	1	2
187	SHC	72	0	1		1	0	1	2	0	1	0	1	1	1			184	91	26.9	11	32	29	0	32.1	0	91.6	81	21.2	20.4	0	1	1	2
188	SHC	51	1	0		0	0	1	0	0	0	2	0	0	0	140	90	160	104	40.6	9	16	unclear	0	16.3	0	91.6	81	10.7	16	0	0	1	2
189	SHC	48	0	0		0	0	1	0	0	0	1	0	0	0	140	80	187	131	37.5	13	31	32	0	30.5	0	86.8	62	82.1	22.1	0	1	0	2
190	SHC	41	0	0		0	0	1	1	0	0	1	0	1	0	135	100	182	135	40.8	5	35	31	0	35.3	0	92.1	79	15.6	13	1	0	1	2
191	SHC	70	0	0		0	0	1	2	0	1	1	1	1	0	130	60	176	80	25.8	4	20.6	19	20	18.2	2.4	91	83	34.1	21.3	1	0	0	1
192	SHC	57	0	0		0	1	1	0	0	0	1	1	0	0	120	80	190	149	41.3	13	36.6	unclear	78	25.7	10.9	94.2	87	0.1	24.5	0	0	1	1
193	SHC	50	0	0		0	0	0	0	0	0	1	0	0	0	120	80	1.83	100	29.9	11	47	36	4	46	0.7	91.8	77	18.6	26.4	1	0	1	2
194	SHC	47	0	0		0	0	1	0	0	0	0	0	0	0	145	95	167	98	35.1	10	38	24	0	70.3	0	93.9	88	0.3	13.5	1	1	1	2
195	SHC	68	0	0		0	0	1	0	0	1	1	1	1	0	140	80	169	73	25.6	3	32	21	1	32.3	0.2	92.4	87	2.8	16.7	1	1	0	2
196	SHC	69	0	0		0	0	1	0	0	0	0	0	0	0			181	100	30.5	6	49.9	53	118	31.6	18.3	91	72	22.4	23.1	0	1	1	2
197	SHC	64	0	0		0	0	1	0	0	0	0			0	160	100	176	101	32.6	3	52	51	9	50.4	1.1	87.3	65	57.4	40.3	1	0	0	2
198	SHC	62	0	0		0	0	0	0	0	0	0	0	0	0	140	85	176	96	31	15	55	55	2	52	0.3	88.8	62	45.9	34.1	1	1	1	2
199	SHC	52	0	0		0	0	0	0	0	0	0	0	0	0	110	70	192	105	28.5	12	43.4	40	34	38	5.5	92.4	77	11.4	24.4	1	0	1	2
200	SHC	62	1	0		0	0	1	0	0	0	0	0	0	0			159	88	34.8	0	20	19	0	20.3	0	91.5	64	11.9	21.3	1	1	0	2
201	SHC	52	0	0		0	0	1	2	0	0	0	1	0	0			184	102	30.1		26	38	1	26.3	0.1	90.9	65	20	18.1	0	1	0	2
202	SHC	71	0	0		0	0	1	3	0	0	0	0	0	0					37.7	6	35	26	0							0	1	1	2
203	SHC	50	0	0		0	0	0	0	0	0	0	0	0	0			192	95	25.8	15	33	15	0	32.6	0	93.4	85	1.1	20.8	1	1	1	2
							9	101
